# Supplementary material for: Association of robot-assisted techniques with the accuracy rates of pedicle screw placement: A network pooling analysis
Source: PubMed Central journal article supplement — eClinicalMedicine. 2022 Jun 9;48:101421. doi: 10.1016/j.eclinm.2022.101421 (PMC9193845; doi:10.1016/j.eclinm.2022.101421), 2022-06-09
Supplement: mmc1.pdf [file mmc1.pdf]

## **Supplementary files**

### **1. Figures (Supplementary Figure 1- Supplementary Figure 26)**

**Supplementary Figure 1. Risk of bias summary of included studies.**

**Supplementary Figure 2. Risk of bias of included studies.**

**Supplementary Figure 3. Orthobot compared with Free-Hand on perfect pedicle screw insertion.**

**Supplementary Figure 4. Renaissance compared with Free-Hand on perfect pedicle screw insertion.**

**Supplementary Figure 5. ROSA compared with Free-Hand on perfect pedicle screw insertion.**

**Supplementary Figure 6. SpineAssist compared with Free-Hand on perfect pedicle screw insertion.**

**Supplementary Figure 7. TiRobot compared with Free-Hand on perfect pedicle screw insertion.**

**Supplementary Figure 8. Subgroup analysis of perfect pedicle screw insertion.**

**Supplementary Figure 9. Orthobot compared with Free-Hand on clinically acceptable pedicle.**

**Supplementary Figure 10. Renaissance compared with Free-Hand on clinically acceptable pedicle.**

**Supplementary Figure 11. ROSA compared with Free-Hand on clinically acceptable pedicle.**

**Supplementary Figure 12. SpineAssist compared with Free-Hand on clinically acceptable pedicle.**

**Supplementary Figure 13. TiRobot compared with Free-Hand on clinically acceptable pedicle.**

**Supplementary Figure 14. Subgroup analysis of clinically acceptable pedicle.**

**Supplementary Figure 15. Sensitivity analysis of overall complications during comparison between the robot-assisted technique versus the conventional freehand technique (excluding Zahrawi 2014).**

**Supplementary Figure 16. Subgroup analysis of screw misplacement rate.**

**Supplementary Figure 17. Contour-enhanced funnel plot of radiation exposure time.**

**Supplementary Figure 18. Subgroup analysis of radiation exposure time.**

**Supplementary Figure 19. Contour-enhanced funnel plot of radiation dosage.**

**Supplementary Figure 20. Subgroup analysis of radiation dosage.**

**Supplementary Figure 21. Pooled analysis of operative time.**

**Supplementary Figure 22. Contour-enhanced funnel plot of operative time.**

**Supplementary Figure 23. Subgroup analysis of operative time.**

**Supplementary Figure 24. Pooled analysis of per screw time.**

**Supplementary Figure 25. Subgroup analysis of perfect pedicle screw insertion in patients with metastases, tumor and infectious diseases of the spine.**

**Supplementary Figure 26. Subgroup analysis of clinically acceptable pedicle screw insertion in patients with metastases and infectious diseases of the spine.**

**2. Tables (Supplementary Table 1- Supplementary Table 6)**

**Supplementary Table 1. Search strategy.**

**Supplementary Table 2. Inclusion/exclusion criteria of literature.**

**Supplementary Table 3. Risk of bias table.**

**Supplementary Table 4. Newcastle-Ottawa quality assessment scale.**

**Supplementary Table 5. Scores of the Newcastle-Ottawa quality assessment scale for 16 cohort studies.**

**Supplementary Table 6. Characteristics of the included trials and participants.**

**Supplementary Figure 1. Risk of bias summary of included studies.**

|             | Random sequence generation (selection bias) | Allocation concealment (selection bias) | Blinding of participants and personnel (performance bias) | Blinding of outcome assessment (detection bias) | Incomplete outcome data (attrition bias) | Selective reporting (reporting bias) | Other bias |
|-------------|---------------------------------------------|-----------------------------------------|-----------------------------------------------------------|-------------------------------------------------|------------------------------------------|--------------------------------------|------------|
| Feng 2019   | ?                                           | +                                       | -                                                         | +                                               | +                                        | +                                    | +          |
| Han 2019    | +                                           | +                                       | -                                                         | +                                               | +                                        | +                                    | +          |
| Hyun 2017   | +                                           | +                                       | -                                                         | ?                                               | +                                        | +                                    | +          |
| Kim 2015    | +                                           | +                                       | -                                                         | +                                               | +                                        | +                                    | +          |
| Kim 2016    | +                                           | +                                       | -                                                         | +                                               | +                                        | +                                    | +          |
| Li 2020     | ?                                           | +                                       | -                                                         | +                                               | +                                        | +                                    | +          |
| Ringel 2012 | ?                                           | ?                                       | -                                                         | +                                               | +                                        | +                                    | +          |
| Roser 2013  | ?                                           | ?                                       | -                                                         | ?                                               | -                                        | -                                    | -          |
| Tian 2017   | +                                           | +                                       | -                                                         | +                                               | +                                        | +                                    | +          |

**Supplementary Figure 2. Risk of bias of included studies.**

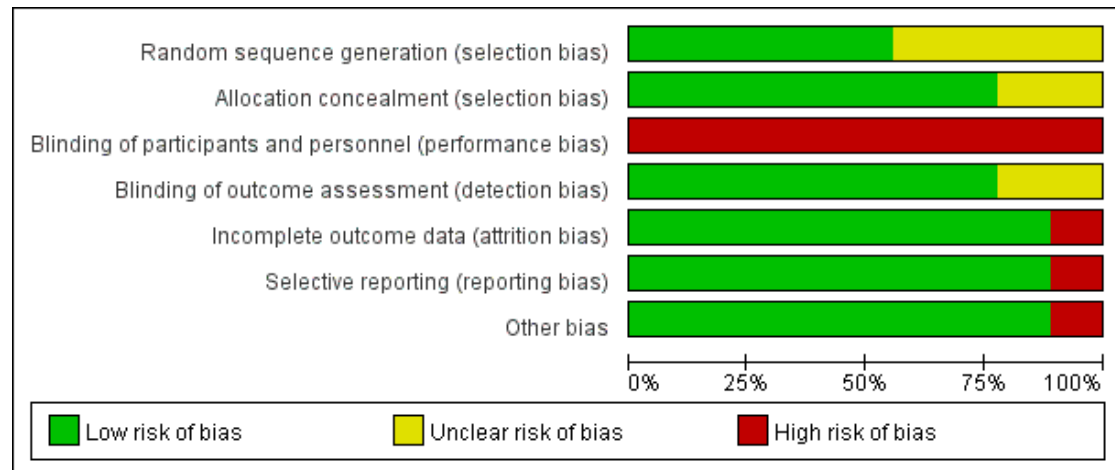

**Supplementary Figure 3. Orthbot compared with Free-Hand on perfect pedicle screw insertion.**

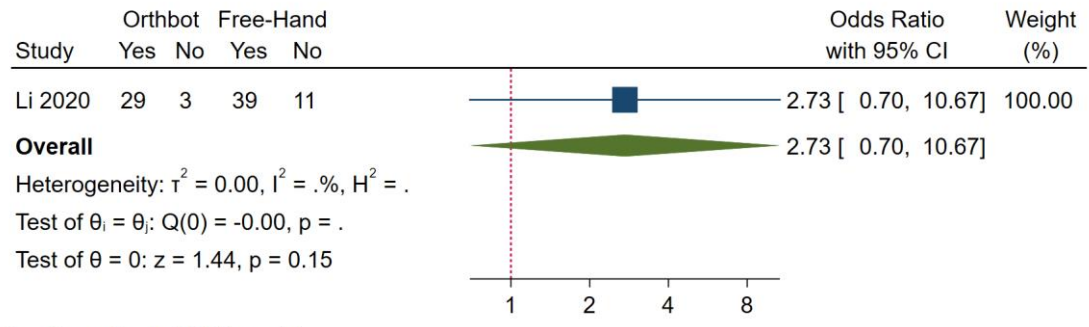

Random-effects REML model

**Supplementary Figure 4. Renaissance compared with Free-Hand on perfect pedicle screw insertion.**

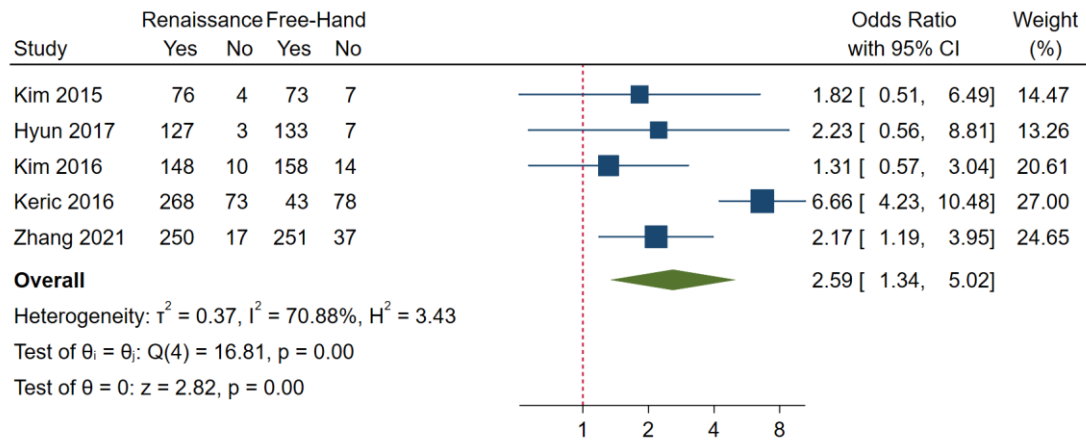

**Supplementary Figure 5. ROSA compared with Free-Hand on perfect pedicle screw insertion.**

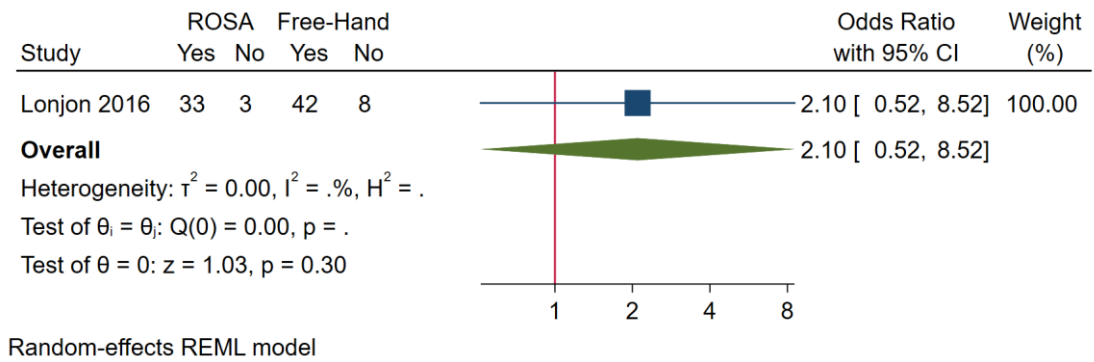

**Supplementary Figure 6. SpineAssist compared with Free-Hand on perfect pedicle screw insertion.**

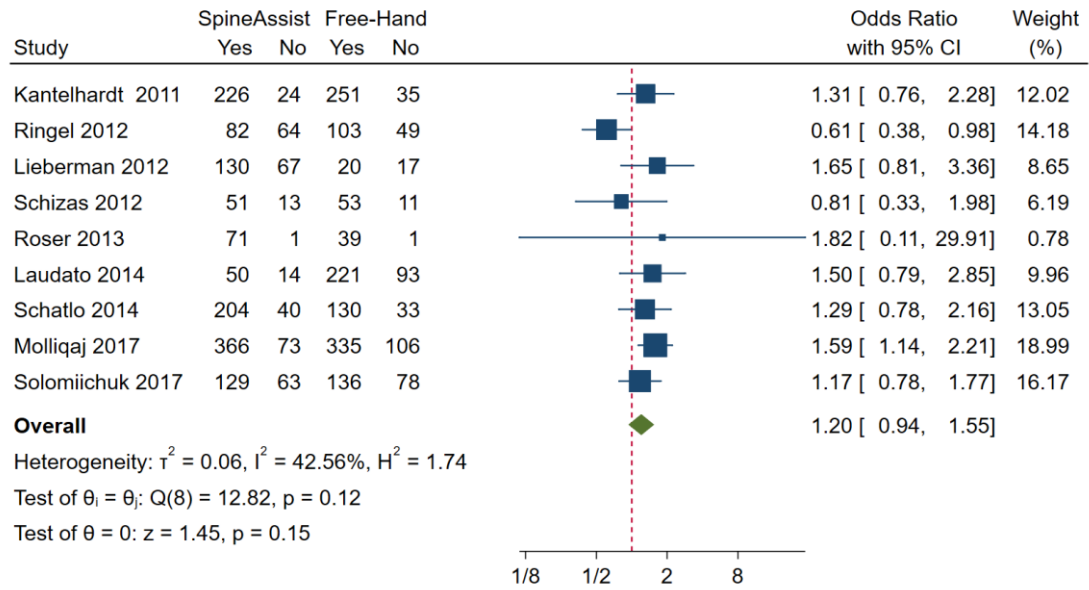

Random-effects REML model



**Supplementary Figure 7. TiRobot compared with Free-Hand on perfect pedicle screw insertion.**

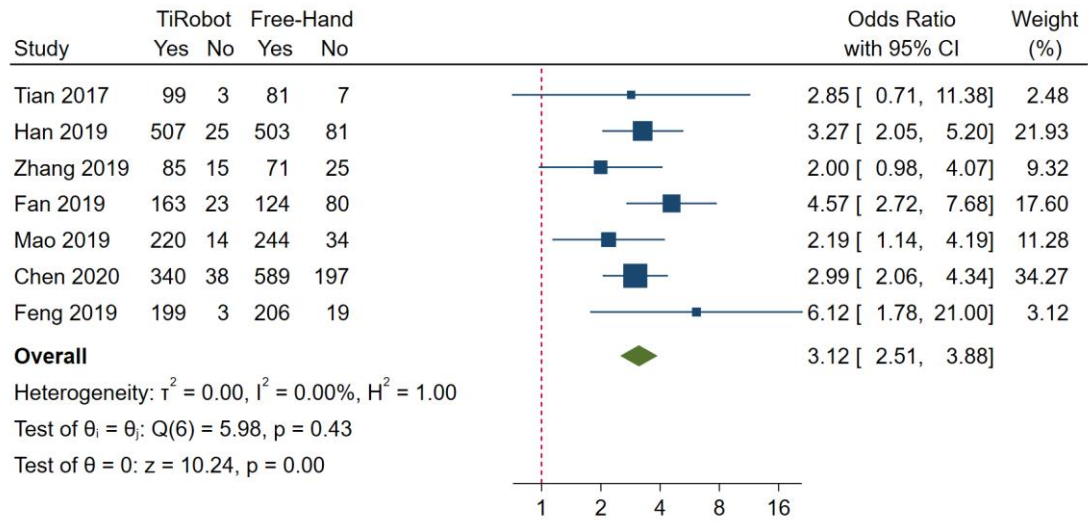

**Supplementary Figure 8. Subgroup analysis of perfect pedicle screw insertion.**

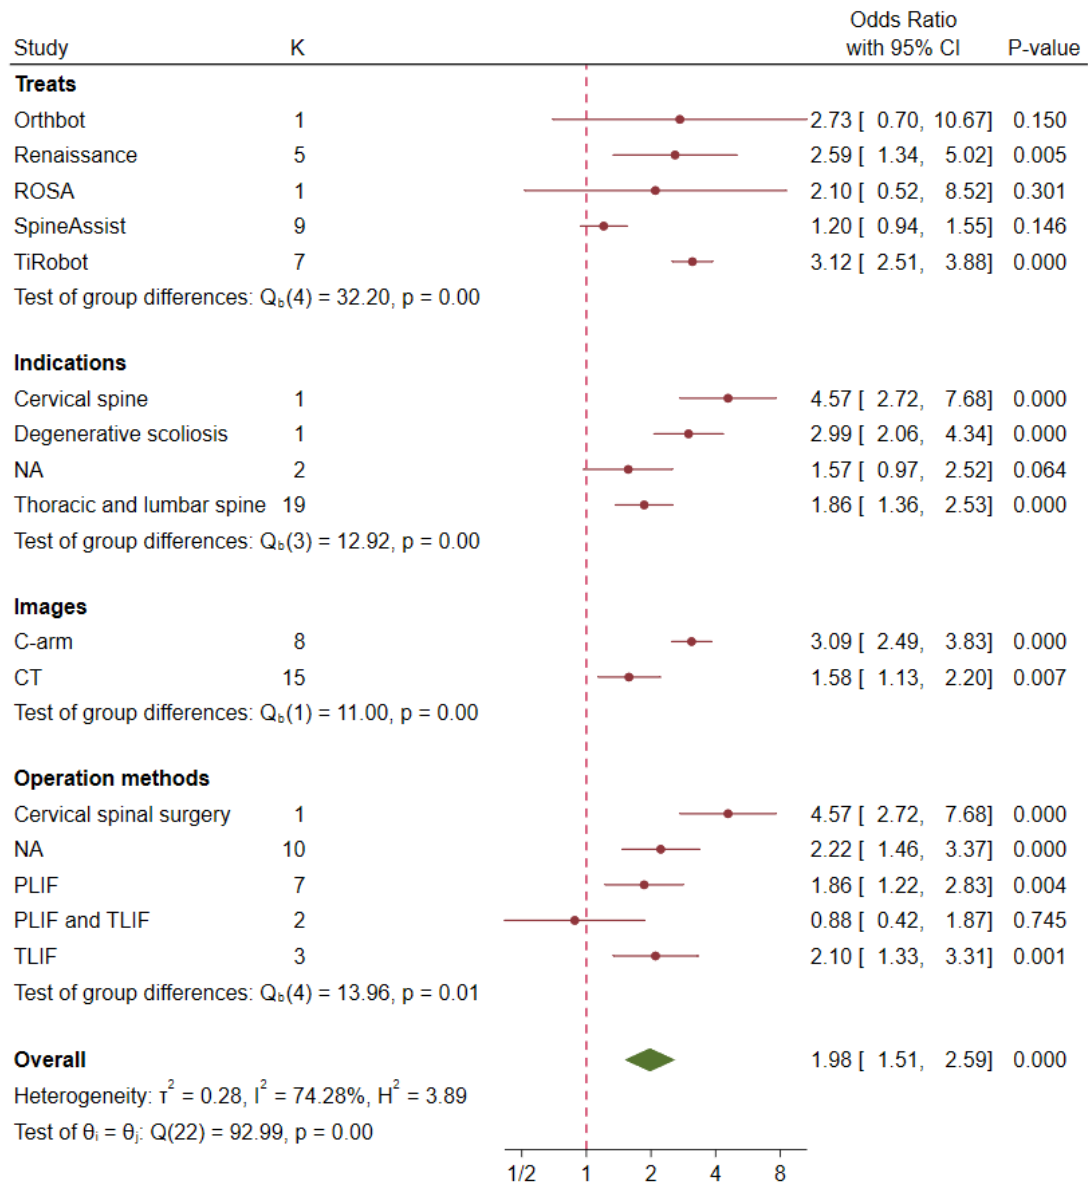

Random-effects REML model

CT: computed tomography; PLIF: Posterior lumbar interbody fusion; TLIF: Transforaminal lumbar interbody fusion.

**Supplementary Figure 9. Orthobot compared with Free-Hand on clinically acceptable pedicle.**

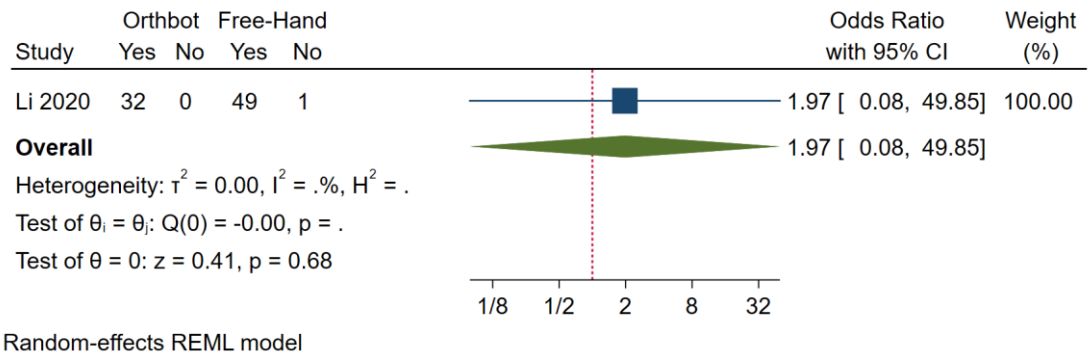

**Supplementary Figure 10. Renaissance compared with Free-Hand on clinically acceptable pedicle.**

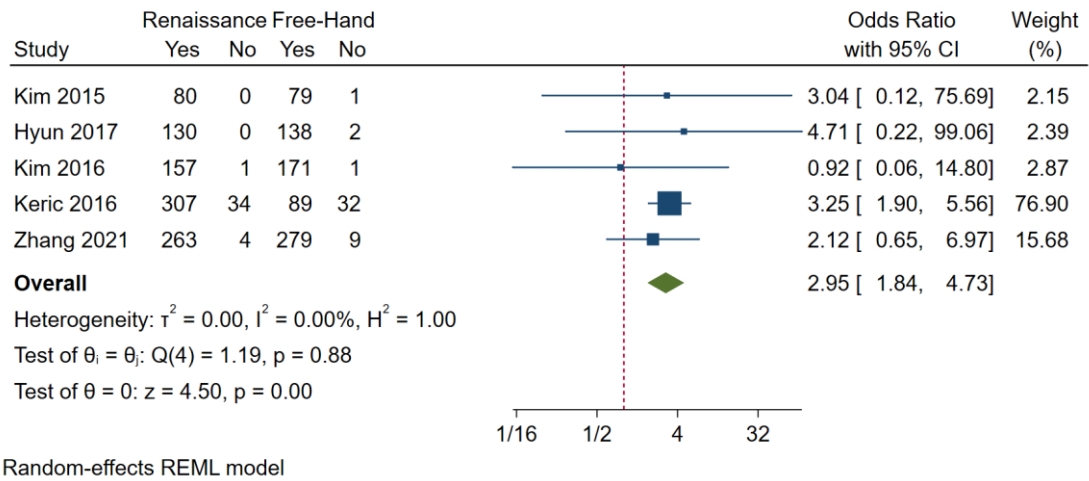

**Supplementary Figure 11. ROSA compared with Free-Hand on clinically acceptable pedicle.**

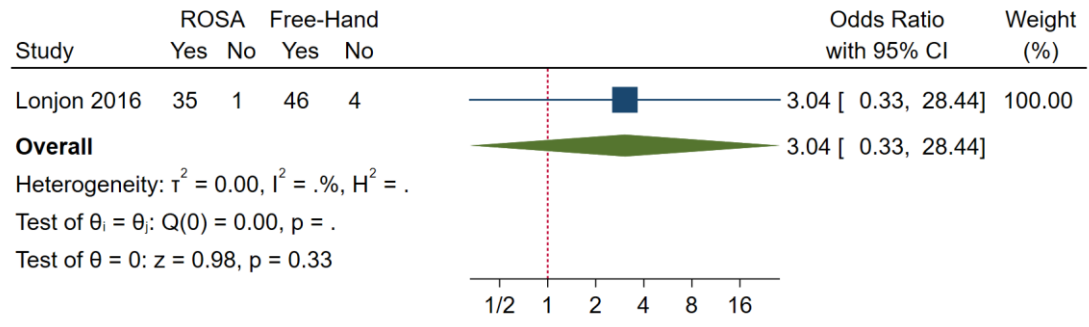

Random-effects REML model

**Supplementary Figure 12. SpineAssist compared with Free-Hand on clinically acceptable pedicle.**

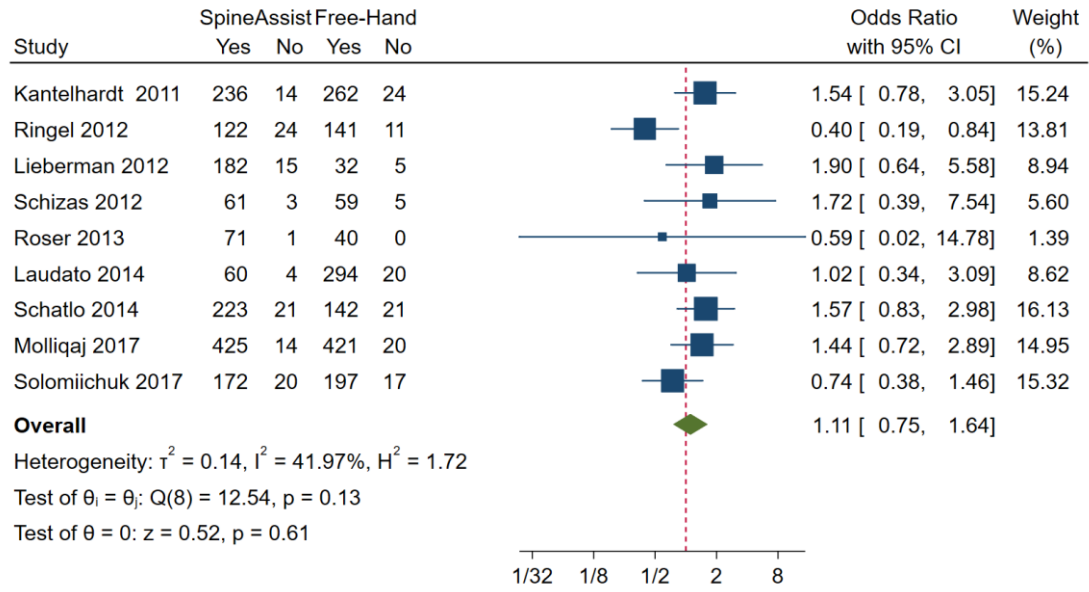

Random-effects REML model

**Supplementary Figure 13. TiRobot compared with Free-Hand on clinically acceptable pedicle.**

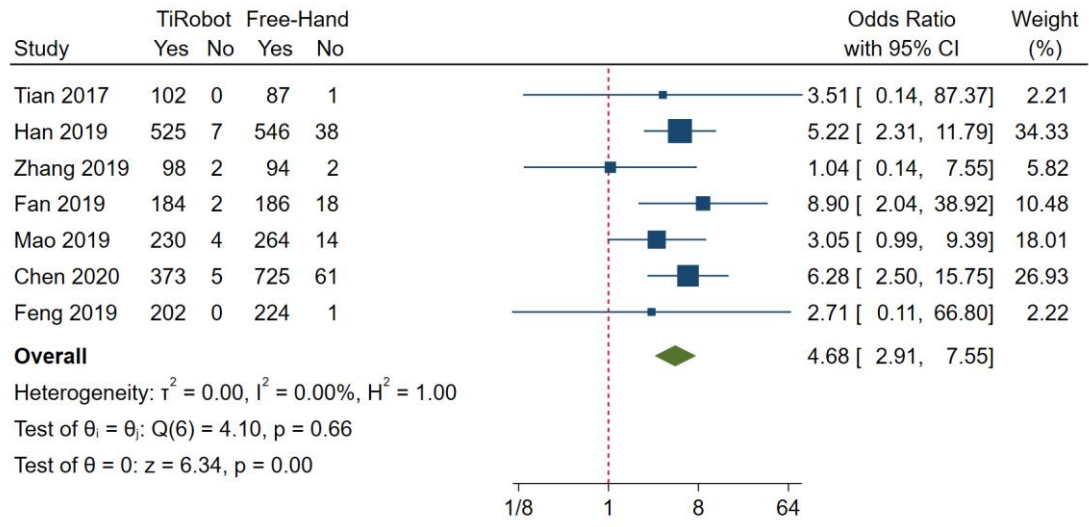

Random-effects REML model

**Supplementary Figure 14. Subgroup analysis of clinically acceptable pedicle.**

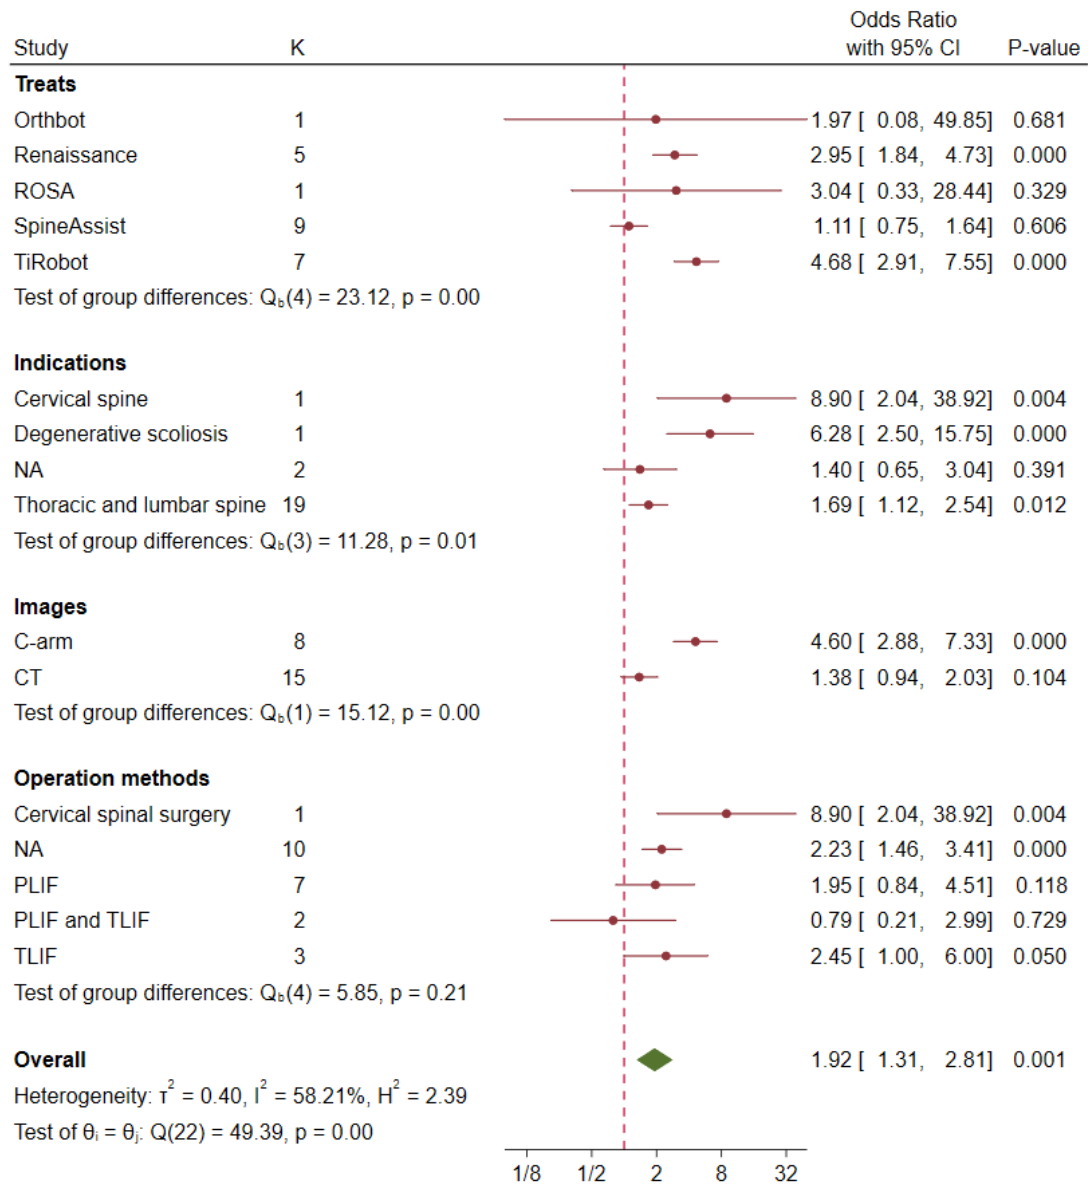

Random-effects REML model

CT: computed tomography; PLIF: Posterior lumbar interbody fusion; TLIF: Transforaminal lumbar interbody fusion.



**Supplementary Figure 15. Sensitivity analysis of overall complications during comparison between the robot-assisted technique versus the conventional freehand technique (excluding Zahrawi 2014).**

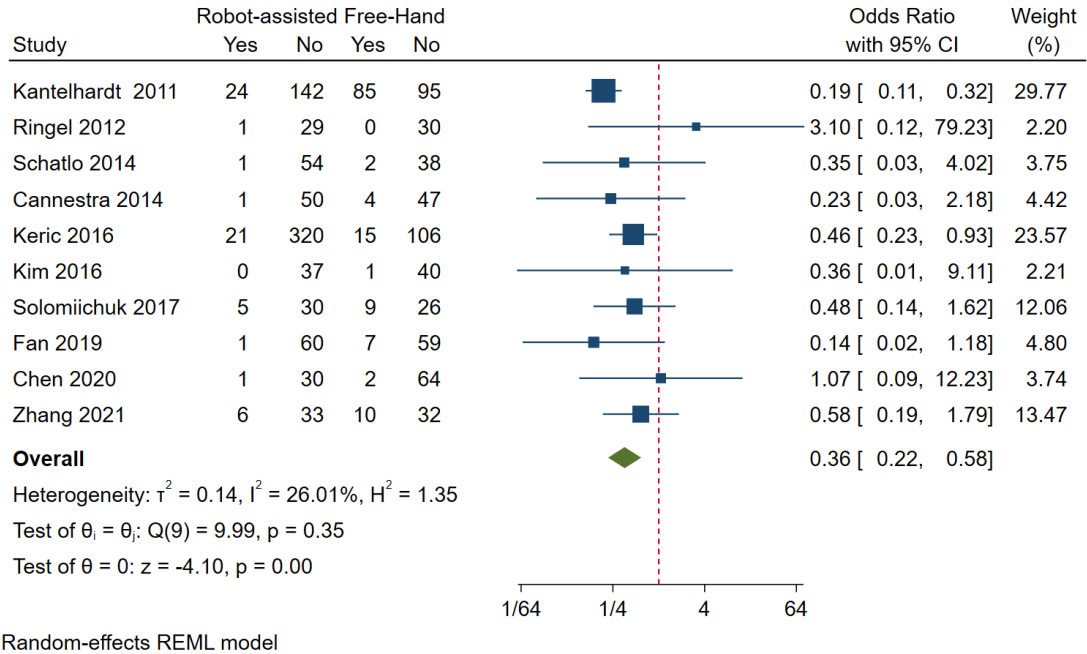

**Supplementary Figure 16. Subgroup analysis of screw misplacement rate.**

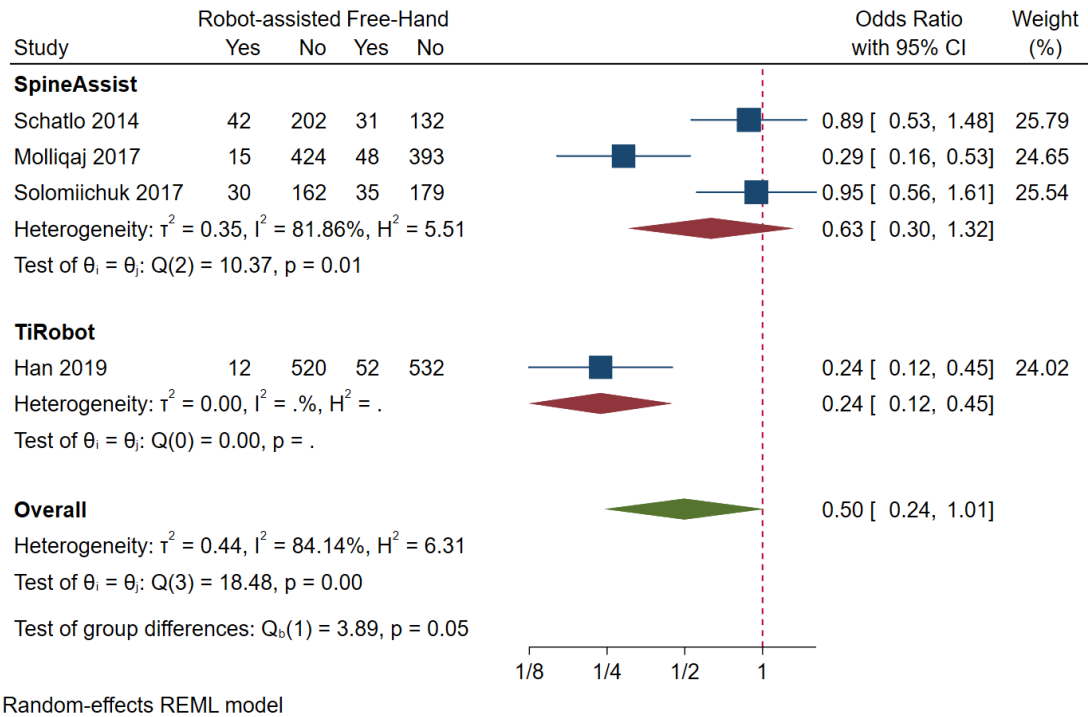

Supplementary Figure 17. Contour-enhanced funnel plot of radiation exposure time.

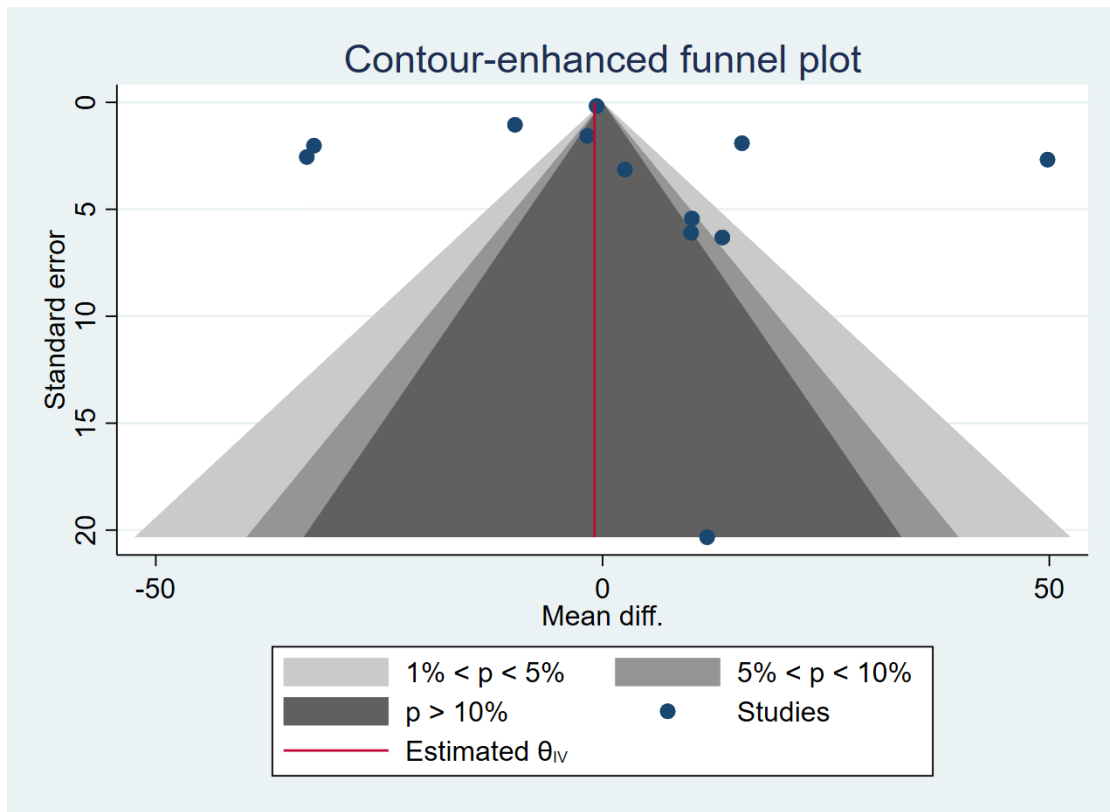

**Supplementary Figure 18. Subgroup analysis of radiation exposure time.**

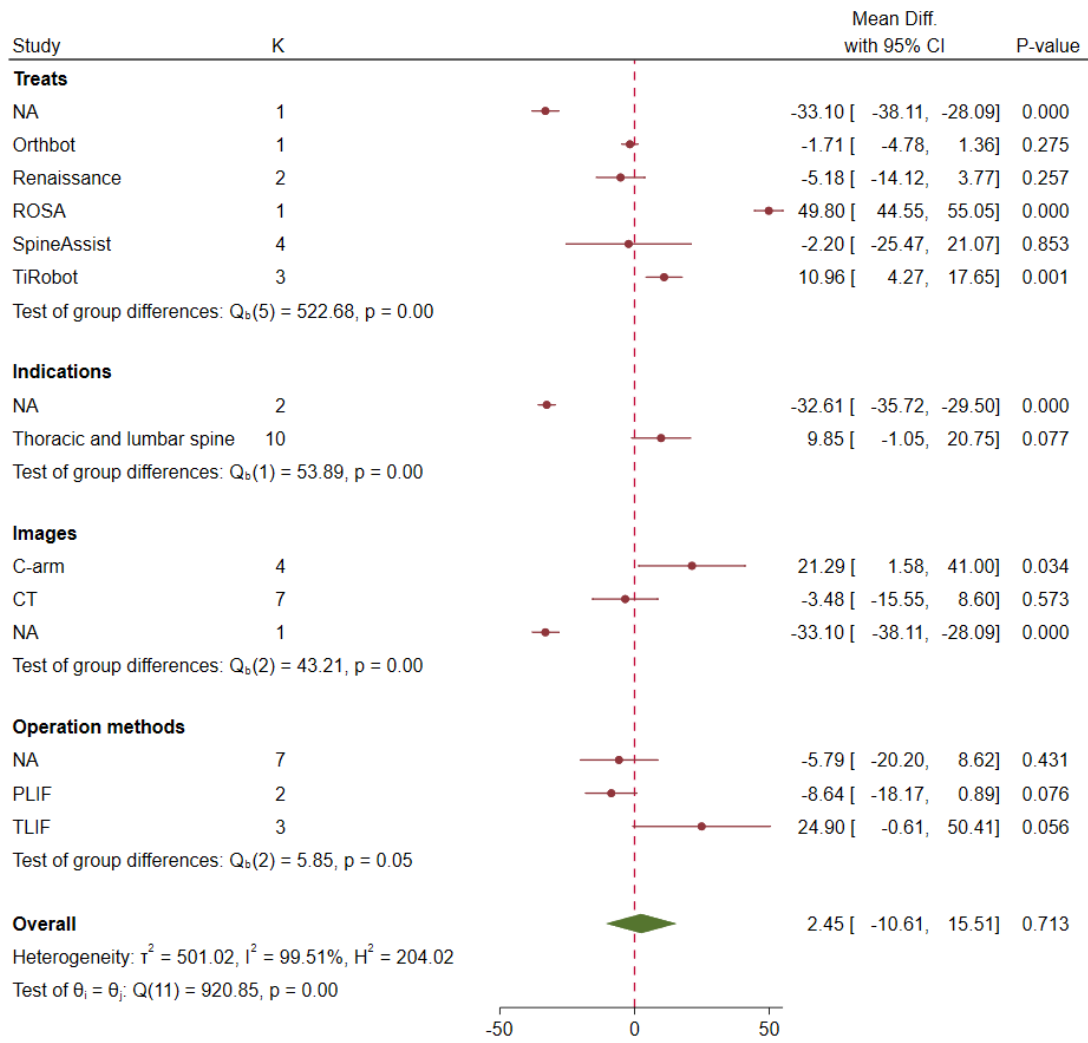

Random-effects REML model

CT: computed tomography; PLIF: Posterior lumbar interbody fusion; TLIF: Transforaminal lumbar interbody fusion.

Supplementary Figure 19. Contour-enhanced funnel plot of radiation dosage.

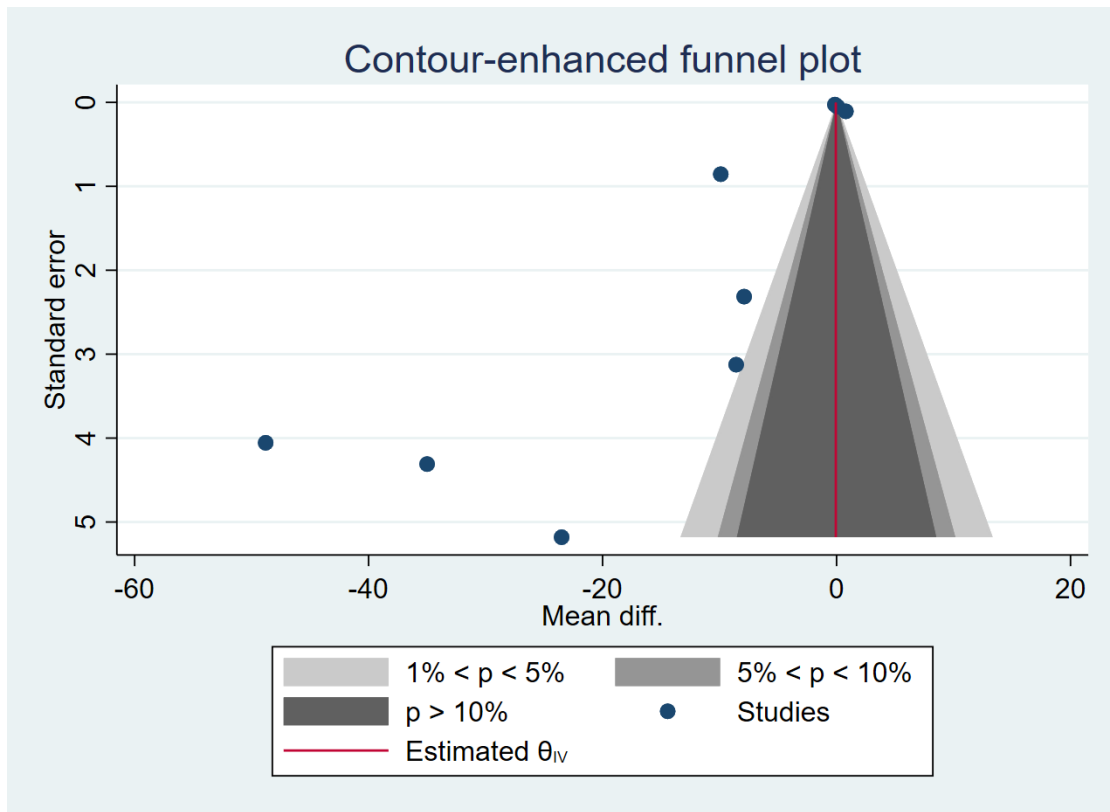

**Supplementary Figure 20. Subgroup analysis of radiation dosage.**

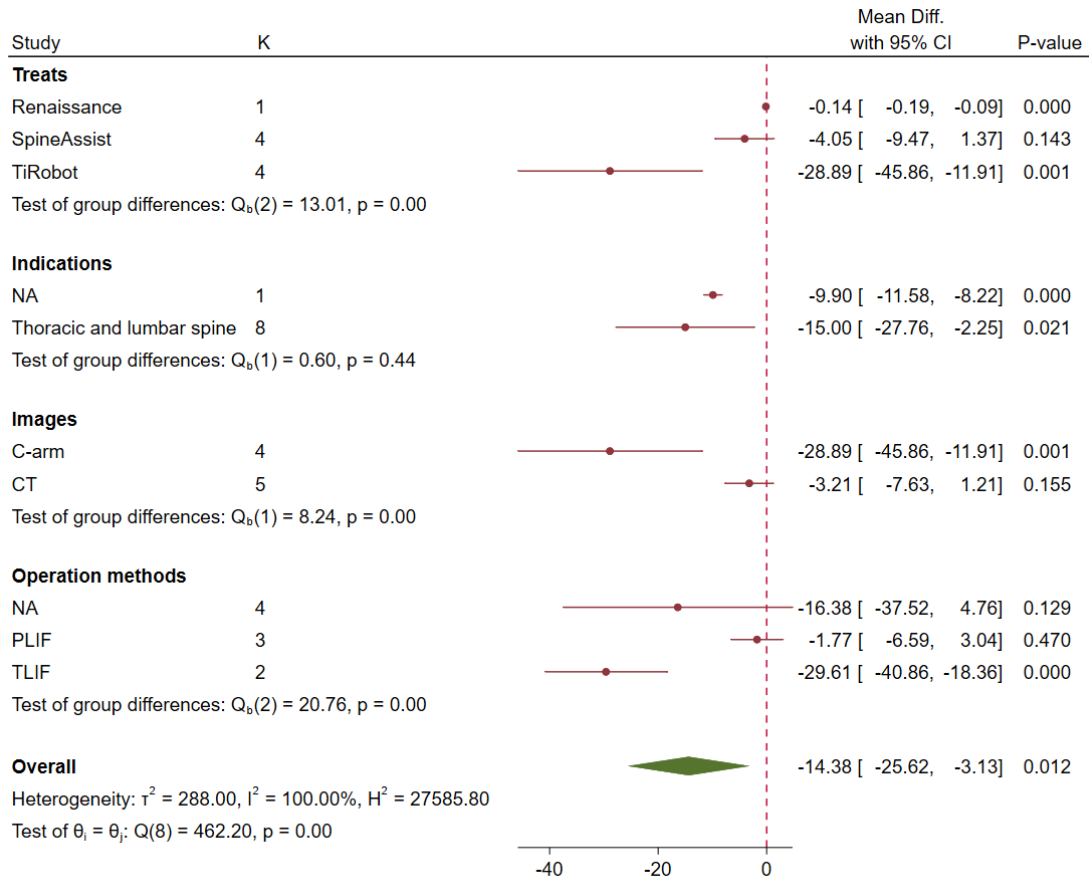

Random-effects REML model

CT: computed tomography; PLIF: Posterior lumbar interbody fusion; TLIF: Transforaminal lumbar interbody fusion.

**Supplementary Figure 21. Pooled analysis of operative time.**

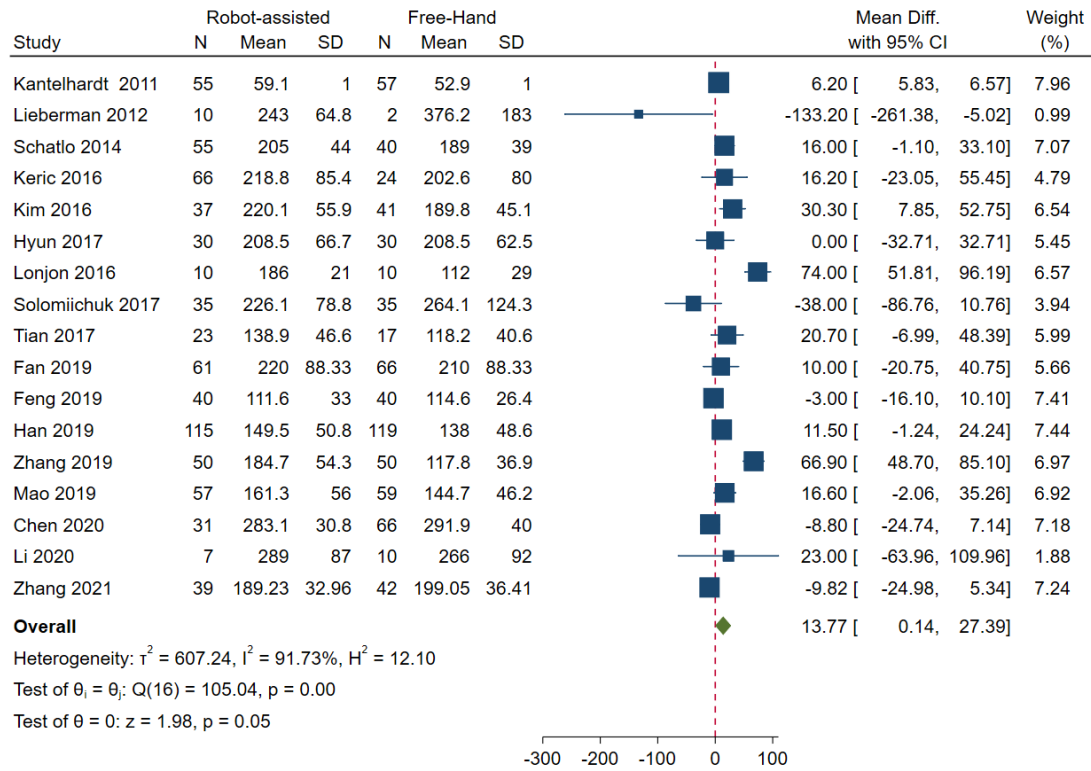

Supplementary Figure 22. Contour-enhanced funnel plot of operative time.

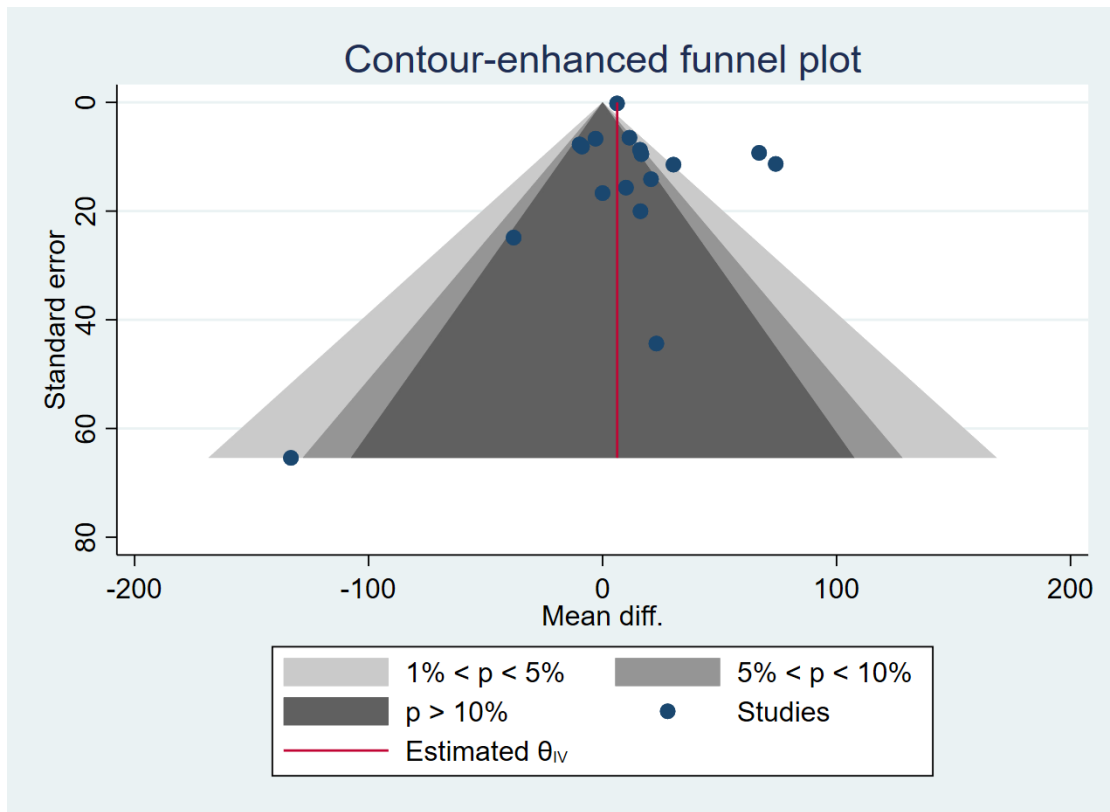



**Supplementary Figure 23. Subgroup analysis of operative time.**

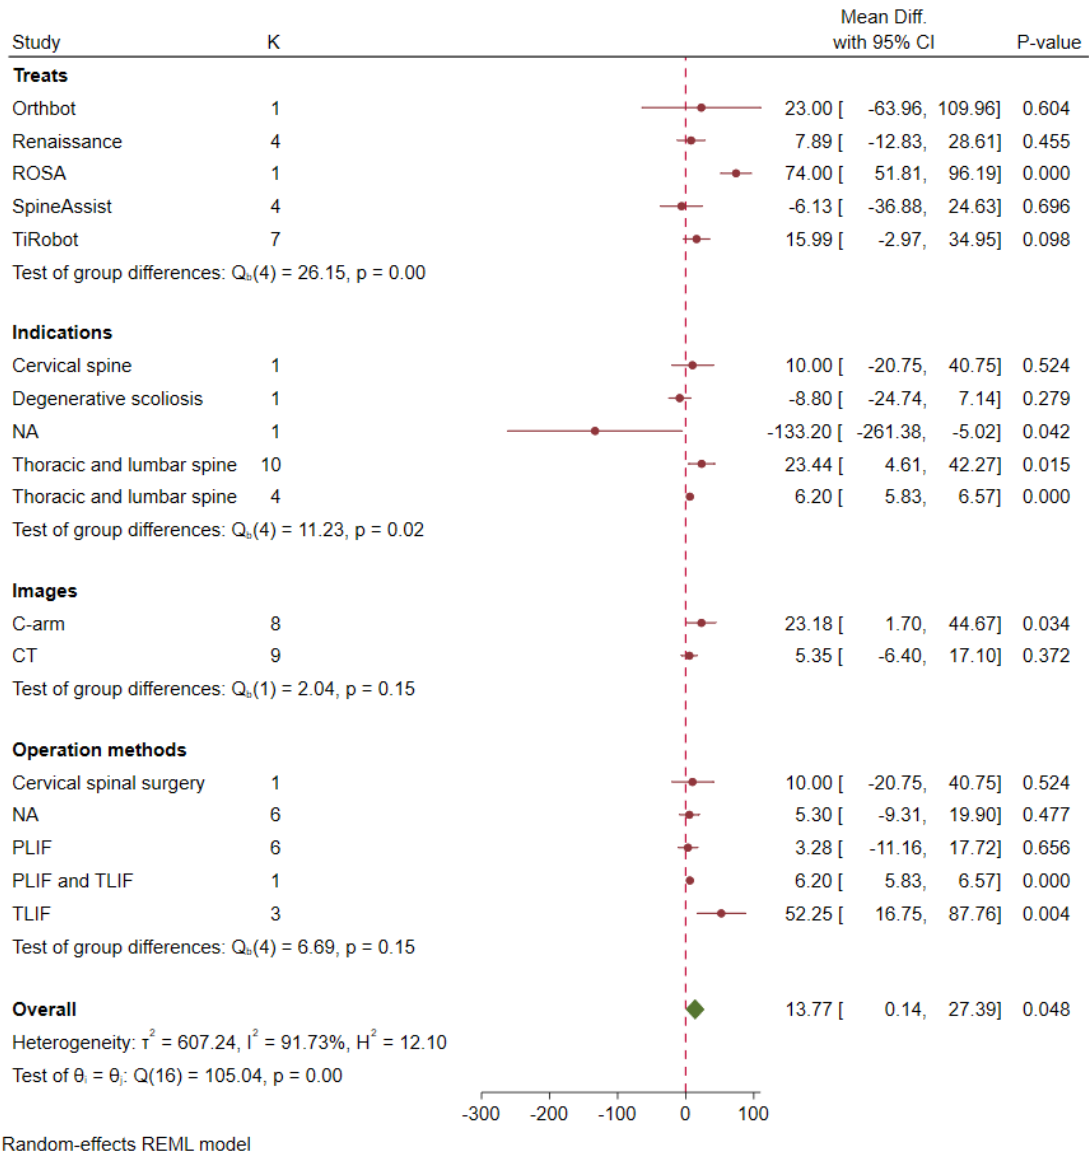

CT: computed tomography; PLIF: Posterior lumbar interbody fusion; TLIF: Transforaminal lumbar interbody fusion.

**Supplementary Figure 24. Pooled analysis of per screw time.**

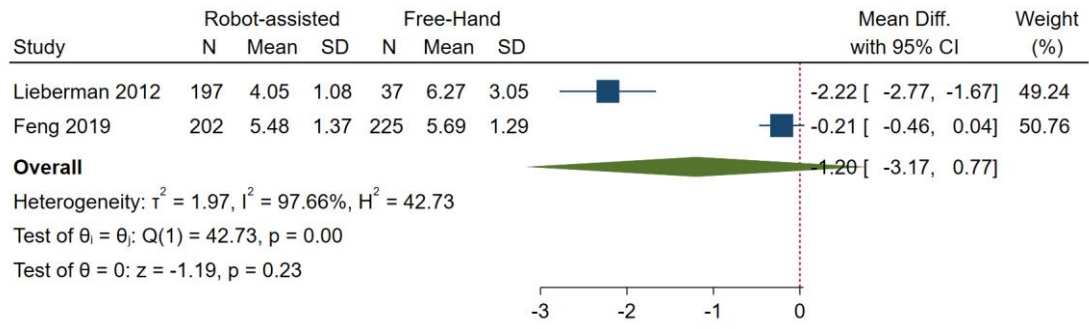

**Supplementary Figure 25. Subgroup analysis of perfect pedicle screw insertion in patients with metastases, tumor and infectious diseases of the spine.**

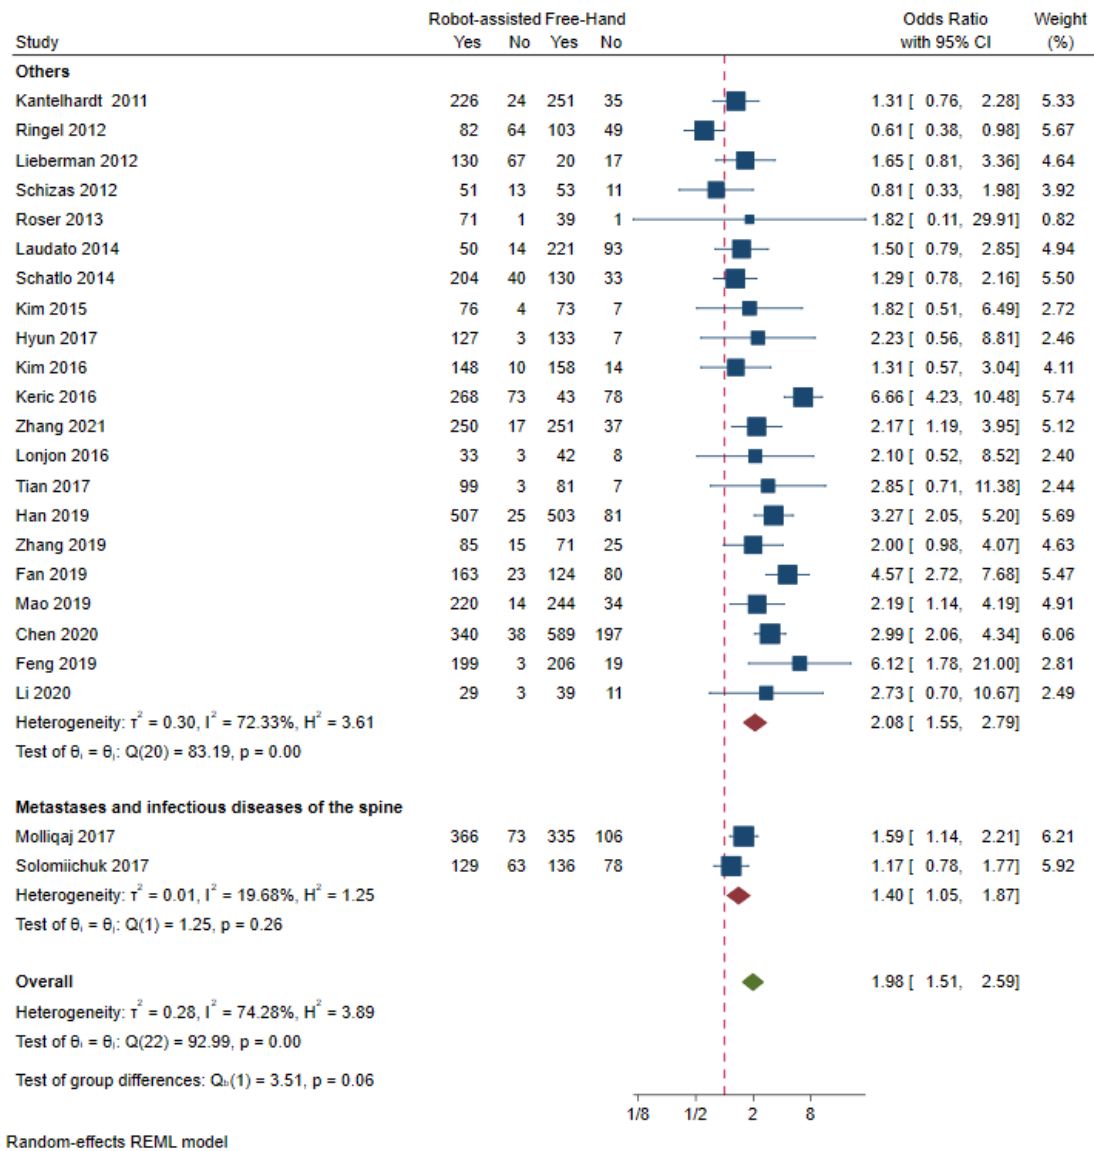

**Supplementary Figure 26. Subgroup analysis of clinically acceptable pedicle screw insertion in patients with metastases and infectious diseases of the spine.**

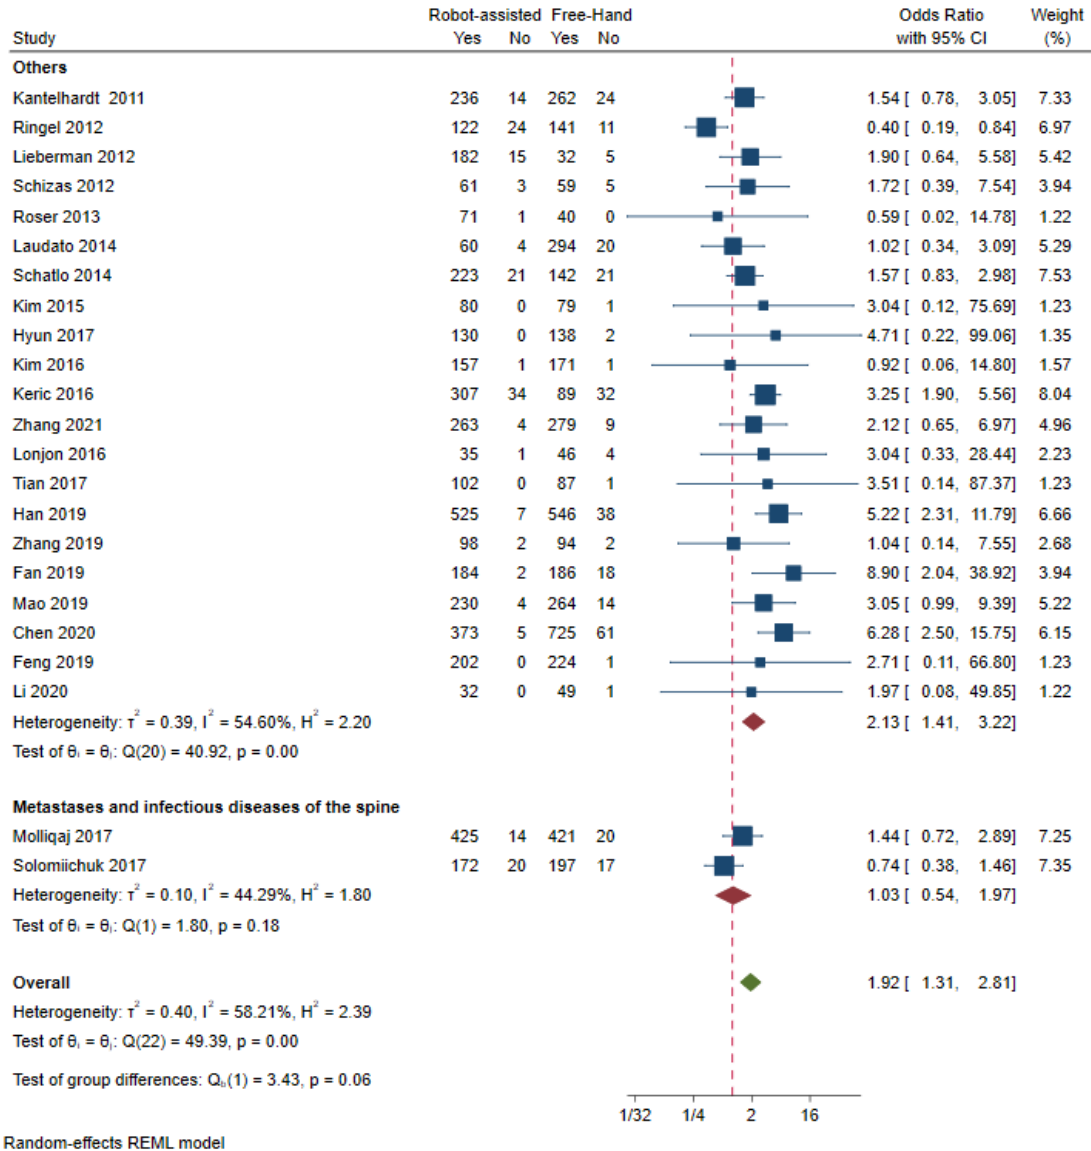

**Supplementary Table 1. Search strategy**

| Database         | Search strategy                                                                                                                                                                                                                                                                                                                                               |
|------------------|---------------------------------------------------------------------------------------------------------------------------------------------------------------------------------------------------------------------------------------------------------------------------------------------------------------------------------------------------------------|
| Pubmed           | #1 "Spine"[MeSH Terms] OR "Vertebral Column"[All Fields] OR "Vertebral Columns"[All Fields] OR "Spinal Column"[All Fields] OR "Spinal Columns"[All Fields] OR "Spine"[All Fields] OR "Vertebra"[All Fields] OR "Vertebrae"[All Fields]<br>#2 "Robotics"[MeSH Terms] OR "robot"[All Fields] OR "robotics"[All Fields] OR "robotic"[All Fields]<br>#3 #1 AND #2 |
| Embase           | #1 "Vertebral Column"[All Fields] OR "Vertebral Columns"[All Fields] OR "Spinal Column"[All Fields] OR "Spinal Columns"[All Fields] OR "Spine"[All Fields] OR "Vertebra"[All Fields] OR "Vertebrae"[All Fields]<br>#2 "robot"[All Fields] OR "robotics"[All Fields] OR "robotic "[All Fields]<br>#3 #1 AND #2                                                 |
| Cochrane library | #1 "Vertebral Column"[TI,AB,KW] OR "Vertebral Columns"[TI,AB,KW] OR "Spinal Column"[TI,AB,KW] OR "Spinal Columns"[TI,AB,KW] OR "Spine"[TI,AB,KW] OR "Vertebra"[TI,AB,KW] OR "Vertebrae"[ TI,AB,KW]<br>#2 "robot"[TI,AB,KW] OR "robotics"[TI,AB,KW] OR "robotic"[TI,AB,KW]<br>#3 #1 AND #2                                                                     |

**Supplementary Table 2. Inclusion/exclusion criteria of literature.**

| <b>PICOS</b> | <b>Inclusion</b>                                                                                                                                                                                       | <b>Exclusion</b>                                                                                                                                                                    |
|--------------|--------------------------------------------------------------------------------------------------------------------------------------------------------------------------------------------------------|-------------------------------------------------------------------------------------------------------------------------------------------------------------------------------------|
| P            | patients with spinal disorders that underwent pedicle screw placement were included in our study                                                                                                       | Patients younger than 18 years old.                                                                                                                                                 |
| I            | 1) patients in the case- or experimental group received robotic-assisted pedicle screw implantation surgery;<br>2) No limit on sample size.                                                            | Other types of minimally invasive technique were excluded.                                                                                                                          |
| C            | patients in the control groups underwent conventional freehand approach.                                                                                                                               | Did not differentiate between single-level and multilevel surgery were not eligible.                                                                                                |
| O            | 1) Primary outcomes including accuracy of pedicle-screw placement, proximal joint violation, and complications.<br>2) Secondary outcome included radiation time, radiation exposure and surgical time. | Relevant outcomes were missing.                                                                                                                                                     |
| S            | RCTs, prospective cohort studies,<br>and retrospective comparative studies in our analysis.                                                                                                            | 1) Articles without peer-reviewed or unpublished;<br>2) Studies that were repeatedly published or had qualitative outcomes;<br>3) Quasi-experimental studies and crossover studies. |

**Supplementary Table 3. Risk of bias table.**

|   |                                                           |
|---|-----------------------------------------------------------|
| 1 | Random sequence generation (selection bias)               |
| 2 | Allocation concealment (selection bias)                   |
| 3 | Blinding of participants and personnel (performance bias) |
| 4 | Blinding of outcome assessment (detection bias)           |
| 5 | Incomplete outcome data (attrition bias)                  |
| 6 | Selective reporting (reporting bias)                      |
| 7 | Other bias                                                |

**Supplementary Table 4. Newcastle-Ottawa quality assessment scale.**

|                                                                                                                                           |
|-------------------------------------------------------------------------------------------------------------------------------------------|
| <b>Selection</b>                                                                                                                          |
| 1. Representativeness of the exposed cohort                                                                                               |
| a) Truly representative of the average _____ (describe) in the community.                                                                 |
| b) Somewhat representative of the average in the community.                                                                               |
| c) Selected group of the users eg. Nurses, volunteers.                                                                                    |
| d) No description of the derivation of the cohort.                                                                                        |
| 2. Selection of the non exposed cohort                                                                                                    |
| a) Drawn from the same community as the exposed cohort.                                                                                   |
| b) Drawn from a different source.                                                                                                         |
| c) No description of the derivation of the non exposed cohort.                                                                            |
| 3. Ascertainment of exposure                                                                                                              |
| a) Secure record (eg. Surgical records).                                                                                                  |
| b) Structured interview.                                                                                                                  |
| c) Written self report.                                                                                                                   |
| d) No description.                                                                                                                        |
| 3. Demonstration that outcome of interest was not present at start of study                                                               |
| a) Yes.                                                                                                                                   |
| d) No.                                                                                                                                    |
| <b>Comparability</b>                                                                                                                      |
| 3. Comparability of the cohorts on the basis of the design or analysis                                                                    |
| a) Study controls for _____ (select the most important factor).                                                                           |
| b) Study controls for any additional factor (This criteria could be modified to indicate specific control for a second important factor). |
| <b>Outcome</b>                                                                                                                            |
| 1. Assessment of outcome                                                                                                                  |



|                                                                       |
|-----------------------------------------------------------------------|
| a) Independent blind assessment.                                      |
| b) Record linkage.                                                    |
| c) Self report.                                                       |
| a) No description.                                                    |
| 2. Was follow up long enough for outcomes to occur                    |
| a) Yes (select an adequate follow up period for outcome of interest). |
| b) No.                                                                |
| 3. Adequacy of follow up of cohorts                                   |
| a) Complete follow up-all subjects accounted for.                     |
| b) Subjects lost to follow up unlikely to introduce bias.             |
| c) Follow up rate <10% and no description of those lost.              |
| d) No statement.                                                      |

**Supplementary Table 5. Scores of the Newcastle-Ottawa quality assessment scale for 16 cohort studies.**

| Study            | Selection | Comparability | Outcome | Total   |
|------------------|-----------|---------------|---------|---------|
| Kantelhardt 2011 | ★★★       | ★★            | ★★★     | ★★★★★★★ |
| Lieberman 2012   | ★★★       | ★             | ★★★     | ★★★★★★★ |
| Schizas 2012     | ★★★       | ★             | ★★★     | ★★★★★★★ |
| Cannestra 2014   | ★★★       | ★             | ★★      | ★★★★★★★ |
| Laudato 2014     | ★★★★      | ★★            | ★★★     | ★★★★★★★ |
| Schatlo 2014     | ★★★       | ★             | ★★★     | ★★★★★★★ |
| Zahrawi 2014     | ★         | -             | ★★      | ★★★     |
| Lonjon 2016      | ★★★       | ★★            | ★★★     | ★★★★★★★ |
| Keric 2016       | ★★★       | ★             | ★★★     | ★★★★★★★ |
| Molliqaj 2017    | ★★★★      | ★★            | ★★★     | ★★★★★★★ |
| Solomiichuk 2017 | ★★★★      | ★★            | ★★★     | ★★★★★★★ |
| Archavlis 2018   | ★★★★      | ★★            | ★★★     | ★★★★★★★ |
| Mao 2019         | ★★★★      | ★★            | ★★★     | ★★★★★★★ |
| Zhang 2019       | ★★★       | ★★            | ★★★     | ★★★★★★★ |
| Chen 2020        | ★★★★      | ★★            | ★★★     | ★★★★★★★ |
| Zhang 2021       | ★★★★      | ★★            | ★★★     | ★★★★★★★ |

**Supplementary Table 6. Characteristics of the included trials and participants.**

| Number | Studies          | Country     | Type of study | Age (yr) |      | Male/ Female |        | Total no. of patient | Pedicle screws     | Robot type          | Indications                                                    | The evaluation criteria of accuracy                                                                                                                                                                  | Images | Screw accuracy | Clinical outcome                                                                                                                    |
|--------|------------------|-------------|---------------|----------|------|--------------|--------|----------------------|--------------------|---------------------|----------------------------------------------------------------|------------------------------------------------------------------------------------------------------------------------------------------------------------------------------------------------------|--------|----------------|-------------------------------------------------------------------------------------------------------------------------------------|
|        |                  |             |               | RA       | FH   | RA           | FH     |                      |                    |                     |                                                                |                                                                                                                                                                                                      |        |                |                                                                                                                                     |
| 1      | Kantelhardt 2011 | Germany     | RCS           | 62.8     | 63.4 | 25/30        | 27/30  | RA: 55<br>FH: 57     | RA: 250<br>FH: 286 | SpineAssist (Mazor) | Spinal fusion in the thoracic and lumbar spine                 | Category A, fully contained within the pedicle; category B, a breach less than 2 mm; category C, a breach of 2 to 4 mm; and category D, a breach greater than 4 mm.                                  | CT     | CT 2mm         | Revision of screws, duration of hospitalizations, infections, CSF fistula, Adverse events, time for surgery, opioid administration. |
| 2      | Lieberman 2012   | USA         | RCCS          | NA       | NA   | NA           | NA     | RA: 10<br>FH: 2      | RA: 197<br>FH: 37  | SpineAssist (Mazor) | Cadaveric Spine                                                | Category A, fully contained within the pedicle; category B, a breach less than 2 mm; category C, a breach of 2 to 4 mm; and category D, a breach greater than 4 mm.                                  | CT     | CT 2 mm        | Radiation level, fluoroscopy time, and procedure time.                                                                              |
| 3      | Ringel 2012      | Germany     | RCT           | 68       | 67   | 14/16        | 12/18  | RA: 30<br>FH: 30     | RA: 146<br>FH: 152 | SpineAssist (Mazor) | Mono- or bi-segmental lumbar or lumbosacral stabilization      | Gertzbein and Robbins scale                                                                                                                                                                          | CT     | CT 2mm         | Postoperative screw revision, hospitalization, radiation exposure, and duration of surgery.                                         |
| 4      | Schizas 2012     | Switzerland | PCS           | 65       | 66   | 6/ 5         | 11/ 12 | RA: 11<br>FH: 23     | RA: 64<br>FH: 64   | SpineAssist (Mazor) | Vertebral fracture, spinal stenosis, degenerative disc disease | Grade A = completely in; Grade B = < 2 mm breach; Grade C = 2-4 mm breach; Grade D = > 4 mm breach                                                                                                   | CT     | CT 2mm         | Complications, screw revisions., radiation doses, duration of radiation.                                                            |
| 5      | Roser 2013       | Germany     | RCT           | NA       | NA   | NA           | NA     | RA: 18<br>FH: 10     | RA: 72<br>FH: 40   | SpineAssist (Mazor) | Monosegmental degenerative lumbar instability                  | Gertzbein and Robbins                                                                                                                                                                                | CT     | CT 2mm         | Radiation dosage, radiation time.                                                                                                   |
| 6      | Cannestra 2014   | USA         | RCS           | NA       | NA   | NA           | NA     | RA: 51<br>FH: 51     | RA: 280<br>FH: 270 | NA                  | Degenerative spine                                             | NA                                                                                                                                                                                                   | NA     | NA             | Complications, radiation exposure.                                                                                                  |
| 7      | Laudato 2014     | Switzerland | RCS           | NA       | NA   | NA           | NA     | RA: 11<br>FH: 48     | RA: 64<br>FH: 314  | SpineAssist (Mazor) | NA                                                             | Grade A = completely in; Grade B = < 2 mm breach; Grade C = 2-4 mm breach; Grade D = > 4 mm breach                                                                                                   | CT     | CT 2mm         | Complications, screw revision.                                                                                                      |
| 8      | Schatlo 2014     | Germany     | RCS           | 52       | 58   | 26/ 29       | 12/ 28 | RA: 55<br>FH: 40     | RA: 55<br>FH: 40   | SpineAssist (Mazor) | Degenerative spine disease                                     | Gertzbein and Robbins scale                                                                                                                                                                          | CT     | CT 2mm         | Screw revision, complication, opioid administration, blood loss, duration of operation, length of stay.                             |
| 9      | Zahrawi 2014     | USA         | RCS           | NA       | NA   | NA           | NA     | RA: 52<br>FH: 70     | RA: 253<br>FH: 383 | Renaissance (Mazor) | Degenerative spine disease                                     | NA                                                                                                                                                                                                   | CT     | CT 2 mm        | Postoperative complication rates, revisions surgery, length of stay, duration of surgery, ODI, blood loss, screw implantation time. |
| 10     | Kim 2015         | South Korea | RCT           | 64.4     | 64.7 | 11/ 9        | 12/ 8  | RA: 20<br>FH: 20     | RA: 80<br>FH: 80   | Renaissance (Mazor) | Lumbar spinal stenosis                                         | Gertzbein and Robbins scale                                                                                                                                                                          | CT     | CT 2mm         | None.                                                                                                                               |
| 11     | Lonjon 2016      | France      | RCS           | 63.4     | 63.4 | 4/6          | 4/ 6   | RA: 10<br>FH: 10     | RA: 40<br>FH: 50   | ROSA                | Degenerative lumbar disease                                    | Gertzbein and Robbins scale                                                                                                                                                                          | C-arm  | CT 2mm         | Duration of surgery, time in the operating room, total dose of radiation, radiation exposure, instrumentation level.                |
| 12     | Keric 2016       | Germany     | RCS           | 72.3     | 68   | 36/30        | 13/11  | RA: 66<br>FH: 24     | RA: 341<br>FH: 121 | Renaissance (Mazor) | Pyogenic spondylodiscitis of the lumbar and thoracic spine     | Screws entirely in the bone were graded 0, encroachment of the cortical bone grade 1, deviation of less than 3 mm grade 2, deviation from 3 to 6 mm grade 3, and deviation of more than 6 mm grade 4 | CT     | CT 2mm         | Postoperative hospitalization, pain, screw revisions, quality of life, ODI.                                                         |
| 13     | Kim 2016         | South Korea | RCT           | 65.4     | 66.0 | 19/ 18       | 22/ 19 | RA: 37<br>FH: 41     | RA: 158<br>FH: 172 | Renaissance (Mazor) | Lumbar spinal stenosis                                         | Gertzbein and Robbins scale                                                                                                                                                                          | CT     | CT 2mm         | Duration of surgery, complications, radiation exposure, time to return to ambulation.                                               |
| 14     | Hyun 2017        | South Korea | RCT           | 66.5     | 66.8 | 9/ 21        | 8/ 22  | RA: 30<br>FH: 30     | RA: 130<br>FH: 140 | Renaissance (Mazor) | Degenerative lumbar disease                                    | Gertzbein and Robbins scale                                                                                                                                                                          | CT     | CT 2mm         | Postoperative screw revision, hospitalization, radiation exposure, pain, quality of life and complications.                         |
| 15     | Molliqaj 2017    | Germany     | RCS           | 58.3     | 54.4 | 50/ 48       | 36/ 35 | RA: 98<br>FH: 71     | RA: 439<br>FH: 441 | SpineAssist (Mazor) | Degenerative, trauma and tumor                                 | Gertzbein and Robbins scale                                                                                                                                                                          | CT     | CT 2mm         | Complications, screw revisions.                                                                                                     |
| 16     | Solomiichuk 2017 | Switzerland | RCS           | 63.7     | 62.2 | 21/ 14       | 23/ 12 | RA: 35<br>FH: 35     | RA: 192<br>FH: 214 | SpineAssist (Mazor) | Metastatic spine disease                                       | Gertzbein and Robbins scale                                                                                                                                                                          | CT     | CT 2mm         | Complications, radiation exposure, radiation time, surgicalsite infection.                                                          |

|    |                |         |     |       |       |       |       |                  |                    |                     |                                                                                  |                             |       |         |                                                                                                                                      |
|----|----------------|---------|-----|-------|-------|-------|-------|------------------|--------------------|---------------------|----------------------------------------------------------------------------------|-----------------------------|-------|---------|--------------------------------------------------------------------------------------------------------------------------------------|
| 17 | Tian 2017      | China   | RCT | NA    | NA    | NA    | NA    | RA: 23<br>FH: 17 | RA: 102<br>FH: 88  | TiRobot<br>(TINAVI) | Lumbar vertebral fracture, lumbar spondylolisthesis                              | Gertzbein and Robbins scale | C-arm | CT 2mm  | Duration of operation.                                                                                                               |
| 18 | Archavlis 2018 | Germany | RCS | 51    | 49    | 22/36 | 32/40 | RA: 58<br>FH: 72 | RA: 116<br>FH: 144 | Renaissance (Mazor) | Degenerative spondylolisthetic stenosis grades I and II and degenerative disease | NA                          | CT    | CT      | Facet joint violation.                                                                                                               |
| 19 | Han 2019       | China   | RCT | 54.6  | 56.1  | 55/60 | 58/61 | RA:115<br>FH:119 | RA: 532<br>FH: 584 | TiRobot<br>(TINAVI) | Degenerative and trauma                                                          | Gertzbein and Robbins scale | C-arm | CT 2mm  | Duration of surgery, length of hospital stay, proximal joint violation, and revision surgery.                                        |
| 20 | Mao 2019       | China   | PCS | 55.1  | 59.2  | 18/39 | 25/34 | RA:57<br>FH:59   | RA: 234<br>FH: 278 | TiRobot<br>(TINAVI) | Degenerative lumbar disease                                                      | Gertzbein and Robbins scale | C-arm | CT 2mm  | Operation time, blood loss, radiation time, radiation dosage, postoperative hospitalization, adverse events, revisions.              |
| 21 | Fan 2019       | China   | RCT | 49    | 49.5  | 31/18 | 39/27 | RA:61<br>FH:66   | RA: 186<br>FH: 204 | TiRobot<br>(TINAVI) | Cervical spinal disease                                                          | Gertzbein and Robbins scale | C-arm | CT      | Duration of surgery, blood loss, postoperative length of stay, and surgery related complications.                                    |
| 22 | Feng 2019      | China   | RCT | 67.55 | 67.88 | 12/28 | 13/27 | RA:40<br>FH:40   | RA: 202<br>FH: 225 | TiRobot<br>(TINAVI) | Degenerative lumbar disease with osteoporosis                                    | Gertzbein and Robbins scale | C-arm | CT 2mm  | Operative time, pedicle screw placement time, radiation exposure to the medical team, and intraoperative blood loss were recorded    |
| 23 | Zhang 2019     | China   | PCS | 54.6  | 55.6  | 17/33 | 21/29 | RA: 50<br>FH: 50 | RA: 100<br>FH: 96  | TiRobot<br>(TINAVI) | Lumbar degenerative disease                                                      | Gertzbein and Robbins scale | C-arm | CT 2mm  | Facet-joint violation, pedicle, surgical time, intraoperative blood loss, length of stay, revision surgery, radiation exposure.      |
| 24 | Chen 2020      | China   | RCS | 69.8  | 69.3  | 12/19 | 25/41 | RA: 31<br>FH: 66 | RA: 378<br>FH: 786 | TiRobot<br>(TINAVI) | Adult degenerative scoliosis                                                     | Gertzbein and Robbins scale | C-arm | CT 2mm  | Operative time, intraoperative blood loss, length of stay, adverse events, revisions.                                                |
| 25 | Li 2020        | China   | RCT | 47.4  | 49.9  | 3/4   | 4/6   | RA: 7<br>FH: 10  | RA: 32<br>FH: 50   | Orthbot             | Degenerative lumbar disc disease or lumbar spinal stenosis                       | Gertzbein and Robbins scale | CT    | CT 1 mm | operation time, blood loss, radiation time (radiation time per case and per screw), length of stay, and screw-related complications. |
| 26 | Zhang 2021     | China   | RCS | 65.95 | 66.86 | 21/18 | 22/20 | RA: 39<br>FH: 42 | RA: 32<br>FH: 50   | Renaissance (Mazor) | Patients underwent lumbar surgery before, and needed revision surgery            | Gertzbein and Robbins scale | CT    | NA      | Operative time, intraoperative blood loss, intraoperative fluoroscopy time, complications.                                           |

RA: robot-assisted; FH: free hand; RCT: randomized controlled trial; RCS: retrospective cohort study; PCS: prospective cohort study; RCCS: retrospective cadaveric cohort study. CT: computed tomography. Gertzbein and Robbins scale: Screw position was classified within the pedicle (group A), cortical breach of less than 2 mm (group B), cortical breach of 2 mm or more but less than 4 mm (group C), cortical breach of 4 mm or more but less than 6 mm (group D), and cortical breach of 6 mm or more (group E).
